# Supplementary material for: Increased somatic mosaicism in autosomal and X chromosomes for suicide death
Source: Springer Nature journal article supplement (doi:10.1038/s41380-024-02718-y), 2024-08-30
Supplement: MOESM1 [file 41380_2024_2718_MOESM1_ESM.pdf]

# **Increased somatic mosaicism in autosomal and X chromosome for suicide death**

## **Supplementary Tables**

- S1. Demographic data of healthy participants and non-suicide decedents as a supplementary cohort
- S2. Detailed information on two-sample Mendelian Randomization analysis
- S3. The results of logistic regression analyses and meta-analysis for mCAs in suicide death
- S4. Distribution of autosomal mCAs in suicide decedents and controls
- S5. The results of logistic regression analyses and meta-analysis for mCAs in suicide death after excluding suicide decedents with diagnosed/possible psychiatric disorders
- S6. The results of logistic regression analyses and meta-analysis for mCAs in suicide death after excluding suicide decedents with comorbid severe physical diseases
- S7. The results of logistic regression analyses and meta-analysis for mCAs in suicide death adjusting for smoking status as an additional covariate
- S8. The results of logistic regression analyses for mCAs between Kobe healthy participants and BBJ controls
- S9. The results of logistic regression analyses for mCAs between suicide decedents and non-suicide decedents
- S10. The results of logistic regression analyses for mCAs in non-suicide decedents and BBJ controls
- S11. The results of logistic regression analyses between mCAs and postmortem interval
- S12. Distribution of mCA events in suicide decedents and controls
- S13. The results of logistic regression analyses and meta-analysis for mCAs in suicide death using only subjects with fewer than ten mCA events

## **Supplementary Figures**

- S1. The results of principal component analysis (PCA)
- S2. An overview of the study cohort

- S3. Distribution of detectable mosaicisms stratified by each autosomal chromosome
- S4. Frequency of detectable mosaicism stratified by age, after excluding suicide decedents with diagnosed/possible psychiatric disorders
- S5. Scatter plot of MR analysis inferring causal effect of mLOX and mLOY on suicide death

**Table S1. Demographic data of healthy participants and non-suicide decedents as a supplementary cohort**

|                                            | Healthy participants <sup>a</sup>            | Non-suicide decedents <sup>a</sup>           |
|--------------------------------------------|----------------------------------------------|----------------------------------------------|
| Number of subjects (M/F)                   | 138 (77/61)                                  | 91 (53/38)                                   |
| Age (mean $\pm$ standard deviation, years) | M: 45.27 $\pm$ 16.53<br>F: 46.79 $\pm$ 21.36 | M: 48.00 $\pm$ 14.75<br>F: 52.34 $\pm$ 14.85 |
| Array                                      |                                              |                                              |
| Illumina Human OmniExpressExome v1.4       | 138                                          | 91                                           |
| Cause of death                             |                                              |                                              |
| Cardiovascular disease                     |                                              | 37 (25/12)                                   |
| Stroke                                     |                                              | 11 (6/5)                                     |
| Traffic accident                           |                                              | 9 (6/3)                                      |
| Endocrine disease                          |                                              | 6 (2/4)                                      |
| Drowning                                   |                                              | 4 (2/2)                                      |
| Intestinal disease                         |                                              | 4 (1/3)                                      |
| Pulmonary disease                          |                                              | 4 (2/2)                                      |
| Sepsis                                     |                                              | 4 (2/2)                                      |
| Frozen                                     |                                              | 3 (1/2)                                      |
| Suffocation                                |                                              | 3 (1/2)                                      |
| Epilepsy                                   |                                              | 2 (2/0)                                      |
| Liver disease                              |                                              | 2 (1/1)                                      |
| Falling                                    |                                              | 1 (1/0)                                      |
| Impalement injury                          |                                              | 1 (1/0)                                      |

<sup>a</sup> DNA samples of healthy participants were extracted from blood when they were alive, and those of non-suicide decedents were extracted from postmortem blood after death (not due to suicide). All sampling and DNA extraction were performed in the same the Department of Psychiatry and Division of Legal Medicine at Kobe University Graduate School of Medicine between 2010 and 2024.

M: male, F: female

**Table S2. Detailed information on two-sample Mendelian Randomization analysis**

| GWAS summary statistics and instrument variables        |         |                                           |                           |                                            |                                                          |
|---------------------------------------------------------|---------|-------------------------------------------|---------------------------|--------------------------------------------|----------------------------------------------------------|
| Exposure                                                | Outcome | GWAS                                      | Ethnicity                 | Number of identified SNPs in exposure GWAS | Number of SNPs used as instrument variables <sup>a</sup> |
| mLOX                                                    | Suicide | Liu et al. 2024 <sup>1</sup> (exposure)   | Trans-ethnic <sup>b</sup> | 56                                         | 29                                                       |
|                                                         |         | Otsuka et al. 2019 <sup>2</sup> (outcome) | Japanese                  |                                            |                                                          |
| mLOY                                                    | Suicide | Terao et al. 2019 <sup>3</sup> (exposure) | Japanese                  | 92 <sup>c</sup>                            | 88                                                       |
|                                                         |         | Otsuka et al. 2019 <sup>2</sup> (outcome) | Japanese                  |                                            |                                                          |
| MR analyses inferring causality of mLOX/mLOY on suicide |         |                                           |                           |                                            |                                                          |
| Exposure                                                | Outcome | MR-Method                                 | Beta (SE)                 | p value                                    |                                                          |
| mLOX                                                    | Suicide | IVW                                       | -0.046 (0.210)            | 0.825                                      |                                                          |
|                                                         |         | MR-Egger                                  | -0.319 (0.379)            | 0.407                                      |                                                          |
|                                                         |         | Simple median                             | -0.089 (0.396)            | 0.823                                      |                                                          |
|                                                         |         | Weighted median                           | -0.303 (0.306)            | 0.322                                      |                                                          |
| mLOY                                                    | Suicide | IVW                                       | -0.032 (0.251)            | 0.900                                      |                                                          |
|                                                         |         | MR-Egger                                  | 0.314 (0.433)             | 0.470                                      |                                                          |
|                                                         |         | Simple median                             | -0.390 (0.447)            | 0.383                                      |                                                          |
|                                                         |         | Weighted median                           | 0.006 (0.374)             | 0.987                                      |                                                          |
| Exposure                                                | Outcome | Egger intercept (SE)                      | p value                   |                                            |                                                          |
| mLOX                                                    | Suicide | 0.019 (0.022)                             | 0.394                     |                                            |                                                          |
| mLOY                                                    | Suicide | -0.013 (0.013)                            | 0.330                     |                                            |                                                          |

<sup>a</sup> Among the identified SNPs in exposure GWAS, only these SNPs were included in outcome GWAS for suicide <sup>2</sup>.

<sup>b</sup> This GWAS <sup>1</sup> included Europeans and Japanese.

<sup>c</sup> These SNPs were significant ( $P < 5 \times 10^{-8}$ ) in European mLOY GWAS (Thompson et al. *Nature* 2019 <sup>4</sup>) and also in the same direction of effects in Japanese mLOY GWAS (Terao et al. 2019 <sup>3</sup>).

GWAS, genome-wide association study; IVW, inverse variance weighted; mLOX, mosaic loss of the X chromosome; mLOY, mosaic loss of the Y chromosome; MR, Mendelian randomization; No., number; SE, standard error; SNP, Single nucleotide polymorphism

## REFERENCES

1. Liu A, Genovese G, Zhao Y, Pirinen M, Zekavat SM, Kentistou KA *et al.* Genetic drivers and cellular selection of female mosaic X chromosome loss. *Nature* 2024; Epub ahead of print.
2. Otsuka I, Akiyama M, Shirakawa O, Okazaki S, Momozawa Y, Kamatani Y *et al.* Genome-wide association studies identify polygenic effects for completed suicide in the Japanese population. *Neuropsychopharmacology* 2019; 44: 2119–2124.
3. Terao C, Momozawa Y, Ishigaki K, Kawakami E, Akiyama M, Loh PR *et al.* GWAS of mosaic loss of chromosome Y highlights genetic effects on blood cell differentiation. *Nat Commun* 2019; 10: 4719.
4. Thompson DJ, Genovese G, Halvardson J, Ulirsch JC, Wright DJ, Terao C *et al.* Genetic predisposition to mosaic Y chromosome loss in blood. *Nature* 2019; 575: 652–657.

**Table S3. The results of logistic regression analyses and meta-analysis for mCAs in suicide death**

|                                 | Number of subjects with mCA events/<br>number of subjects |               | OR (95% CI)        | p value                        | P <sub>het</sub> <sup>a</sup> |
|---------------------------------|-----------------------------------------------------------|---------------|--------------------|--------------------------------|-------------------------------|
| All autosomal mCAs <sup>b</sup> | Suicide decedents                                         | Controls      |                    |                                |                               |
| 1st set                         | 37/410                                                    | 8,731/88,870  | 1.58 (1.11 – 2.25) | 1.11×10 <sup>-2 c</sup>        |                               |
| 2nd set                         | 52/363                                                    | 8,814/88,870  | 1.94 (1.43 – 2.65) | <b>2.50×10<sup>-5 c</sup></b>  |                               |
| Combined                        |                                                           |               | 1.78 (1.41 – 2.24) | <b>1.28×10<sup>-6 d</sup></b>  | 0.388                         |
| Loss                            | Suicide decedents                                         | Controls      |                    |                                |                               |
| 1st set                         | 13/410                                                    | 2,636/88,870  | 1.83 (1.04 – 3.24) | 3.72×10 <sup>-2 c</sup>        |                               |
| 2nd set                         | 27/363                                                    | 2,667/88,870  | 3.30 (2.19 – 4.95) | <b>9.33×10<sup>-9 c</sup></b>  |                               |
| Combined                        |                                                           |               | 2.70 (1.94 – 3.76) | <b>4.05×10<sup>-9 d</sup></b>  | 0.100                         |
| CN-LOH                          | Suicide decedents                                         | Controls      |                    |                                |                               |
| 1st set                         | 20/410                                                    | 5,270/88,870  | 1.34 (0.84 – 2.12) | 0.217 <sup>c</sup>             |                               |
| 2nd set                         | 22/363                                                    | 5,237/88,870  | 1.23 (0.79 – 1.91) | 0.358 <sup>c</sup>             |                               |
| Combined                        |                                                           |               | 1.28 (0.93 – 1.76) | 0.129 <sup>d</sup>             | 0.797                         |
| Gain                            | Suicide decedents                                         | Controls      |                    |                                |                               |
| 1st set                         | 6/410                                                     | 1,417/88,870  | 1.74 (0.76 – 3.98) | 0.188 <sup>c</sup>             |                               |
| 2nd set                         | 12/363                                                    | 1,485/88,870  | 2.53 (1.40 – 4.58) | <b>2.08×10<sup>-3 c</sup></b>  |                               |
| Combined                        |                                                           |               | 2.23 (1.38 – 3.61) | <b>1.08×10<sup>-3 d</sup></b>  | 0.471                         |
| mLOX                            | Suicide decedents                                         | Controls      |                    |                                |                               |
| 1st set                         | 46/135                                                    | 12,367/41,223 | 3.99 (2.64 – 6.05) | <b>6.00×10<sup>-16 c</sup></b> |                               |
| 2nd set                         | 64/123                                                    | 12,529/41,224 | 4.01 (2.69 – 5.96) | <b>7.12×10<sup>-12 c</sup></b> |                               |
| Combined                        |                                                           |               | 4.00 (3.00 – 5.33) | <b>2.66×10<sup>-21 d</sup></b> | 0.992                         |
| mLOY                            | Suicide decedents                                         | Controls      |                    |                                |                               |
| 1st set                         | 26/275                                                    | 11,290/47,647 | 0.77 (0.50 – 1.20) | 0.256 <sup>c</sup>             |                               |
| 2nd set                         | 29/240                                                    | 11,445/47,646 | 0.64 (0.42 – 0.99) | 4.43×10 <sup>-2 c</sup>        |                               |
| Combined                        |                                                           |               | 0.71 (0.52 – 0.96) | 2.56×10 <sup>-2 d</sup>        | 0.552                         |

<sup>a</sup> P for heterogeneity between two analyses (first set and second set) were calculated by Cochran's Q test.

<sup>b</sup> This indicates the number of subjects with at least one of loss, CN-LOH or gain in autosomal chromosomes.

<sup>c</sup> The p values were calculated with logistic regression analyses, using sex, age and age-squared as confounding factors.

<sup>d</sup> The p values were calculated with meta-analyses with the fixed-effect model. The p values in bold indicate statistically significant ( $p < 0.05/6 [= 8.33 \times 10^{-3}]$ ).

CI, confidence interval; CN-LOH, copy-neutral loss of heterozygosity; mCAs, mosaic chromosomal alterations; mLOX, mosaic loss of the X chromosome; mLOY, mosaic loss of the Y chromosome; OR, odds ratio



**Table S4. Distribution of autosomal mCAs in suicide decedents and controls**

| Chromosome | <u>Loss</u>       |          |                               | <u>CN-LOH</u>     |          |                              | <u>Gain</u>       |          |                              |
|------------|-------------------|----------|-------------------------------|-------------------|----------|------------------------------|-------------------|----------|------------------------------|
|            | Suicide decedents | Controls | p value <sup>a</sup>          | Suicide decedents | Controls | p value <sup>a</sup>         | Suicide decedents | Controls | p value <sup>a</sup>         |
| 1          | 0.83%             | 1.86%    | 0.729                         | 1.67%             | 7.80%    | <b>8.89×10<sup>-3*</sup></b> | 0.83%             | 0.09%    | 0.102                        |
| 2          | 1.67%             | 1.31%    | 0.673                         | 3.33%             | 1.89%    | 0.294                        | 1.67%             | 0.06%    | <b>3.07×10<sup>-3*</sup></b> |
| 3          | 1.67%             | 0.99%    | 0.334                         | 3.33%             | 1.60%    | 0.129                        | 1.67%             | 0.29%    | <b>0.0485*</b>               |
| 4          | 2.50%             | 1.22%    | 0.182                         | 1.67%             | 1.18%    | 0.655                        | 0.00%             | 0.16%    | 1.000                        |
| 5          | 2.50%             | 1.65%    | 0.453                         | 0.83%             | 0.98%    | 1.000                        | 0.00%             | 0.03%    | 1.000                        |
| 6          | 0.00%             | 1.88%    | 0.178                         | 3.33%             | 2.96%    | 0.783                        | 0.00%             | 0.06%    | 1.000                        |
| 7          | 1.67%             | 1.24%    | 0.662                         | 0.00%             | 1.09%    | 0.643                        | 0.00%             | 0.03%    | 1.000                        |
| 8          | 2.50%             | 0.77%    | 0.0669                        | 0.83%             | 1.18%    | 1.000                        | 1.67%             | 1.49%    | 0.700                        |
| 9          | 0.00%             | 1.14%    | 0.649                         | 3.33%             | 3.43%    | 1.000                        | 1.67%             | 0.54%    | 0.140                        |
| 10         | 0.83%             | 0.46%    | 0.428                         | 0.83%             | 1.03%    | 1.000                        | 0.00%             | 0.03%    | 1.000                        |
| 11         | 1.67%             | 2.29%    | 1.000                         | 2.50%             | 4.35%    | 0.496                        | 0.00%             | 0.05%    | 1.000                        |
| 12         | 0.00%             | 0.64%    | 1.000                         | 0.83%             | 1.48%    | 1.000                        | 0.83%             | 0.39%    | 0.378                        |
| 13         | 1.67%             | 1.96%    | 1.000                         | 1.67%             | 1.56%    | 0.712                        | 0.00%             | 0.25%    | 1.000                        |
| 14         | 10.00%            | 2.69%    | <b>1.13×10<sup>-4**</sup></b> | 2.50%             | 10.22%   | <b>2.21×10<sup>-3*</sup></b> | 2.50%             | 1.38%    | 0.231                        |
| 15         | 0.00%             | 0.59%    | 1.000                         | 1.67%             | 2.41%    | 1.000                        | 1.67%             | 3.74%    | 0.332                        |
| 16         | 0.83%             | 1.00%    | 1.000                         | 3.33%             | 2.35%    | 0.371                        | 0.00%             | 0.03%    | 1.000                        |
| 17         | 0.00%             | 1.17%    | 0.653                         | 0.83%             | 2.42%    | 0.375                        | 0.83%             | 0.07%    | 0.0859                       |
| 18         | 1.67%             | 0.43%    | 0.0972                        | 1.67%             | 0.71%    | 0.210                        | 0.00%             | 0.69%    | 1.000                        |
| 19         | 0.83%             | 0.38%    | 0.370                         | 0.00%             | 1.68%    | 0.273                        | 0.00%             | 0.05%    | 1.000                        |
| 20         | 4.17%             | 4.15%    | 1.000                         | 1.67%             | 1.44%    | 0.693                        | 0.83%             | 0.07%    | 0.0859                       |
| 21         | 1.67%             | 0.54%    | 0.140                         | 1.67%             | 2.13%    | 1.000                        | 5.00%             | 4.00%    | 0.485                        |
| 22         | 1.67%             | 0.88%    | 0.287                         | 0.83%             | 1.86%    | 0.729                        | 4.17%             | 1.58%    | <b>0.0435*</b>               |

This table provides numeric data plotted in Fig. S2. Frequencies indicate the contribution of each event type to the total number of mCAs classified as loss, CN-LOH, or gain in each data set.

<sup>a</sup> p values were calculated with Fisher's exact test. p values in bold indicate p < 0.05.

\* nominally significant (p < 0.05), \*\* significant after Bonferroni adjustment (p < 0.05/66 [= 7.58×10<sup>-4</sup>])

CN-LOH, copy-neutral loss of heterozygosity; mCAs, mosaic chromosomal alterations

**Table S5. The results of logistic regression analyses and meta-analysis for mCAs in suicide death after excluding suicide decedents with diagnosed/possible psychiatric disorders**

|                                 | Number of subjects with mCA events/<br>number of subjects |               | OR (95% CI)         | p value                                  | P <sub>het</sub> <sup>a</sup> |
|---------------------------------|-----------------------------------------------------------|---------------|---------------------|------------------------------------------|-------------------------------|
| All autosomal mCAs <sup>b</sup> | Suicide decedents<br>(no psychiatric disorders)           | Controls      |                     |                                          |                               |
| 1st set                         | 13/145                                                    | 8,731/88,870  | 1.21 (0.67 – 2.17)  | 0.527 <sup>c</sup>                       |                               |
| 2nd set                         | 27/158                                                    | 8,814/88,870  | 2.13 (1.37 – 3.29)  | <b>7.14×10<sup>-4</sup></b> <sup>c</sup> |                               |
| Combined                        |                                                           |               | 1.74 (1.22 – 2.47)  | <b>2.01×10<sup>-3</sup></b> <sup>d</sup> | 0.130                         |
| Loss                            | Suicide decedents                                         | Controls      |                     |                                          |                               |
| 1st set                         | 4/145                                                     | 2,636/88,870  | 1.26 (0.46 – 3.45)  | 0.648 <sup>c</sup>                       |                               |
| 2nd set                         | 15/158                                                    | 2,667/88,870  | 3.75 (2.16 – 6.51)  | <b>2.73×10<sup>-6</sup></b> <sup>c</sup> |                               |
| Combined                        |                                                           |               | 2.91 (1.79 – 4.72)  | <b>1.50×10<sup>-5</sup></b> <sup>d</sup> | 0.0636                        |
| CN-LOH                          | Suicide decedents                                         | Controls      |                     |                                          |                               |
| 1st set                         | 7/145                                                     | 5,270/88,870  | 1.03 (0.48 – 2.22)  | 0.946 <sup>c</sup>                       |                               |
| 2nd set                         | 13/158                                                    | 5,237/88,870  | 1.55 (0.86 – 2.77)  | 0.142 <sup>c</sup>                       |                               |
| Combined                        |                                                           |               | 1.33 (0.84 – 2.12)  | 0.226 <sup>d</sup>                       | 0.406                         |
| Gain                            | Suicide decedents                                         | Controls      |                     |                                          |                               |
| 1st set                         | 2/145                                                     | 1,417/88,870  | 1.21 (0.30 – 4.96)  | 0.789 <sup>c</sup>                       |                               |
| 2nd set                         | 5/158                                                     | 1,485/88,870  | 2.06 (0.83 – 5.12)  | 0.118 <sup>c</sup>                       |                               |
| Combined                        |                                                           |               | 1.76 (0.82 – 3.79)  | 0.145 <sup>d</sup>                       | 0.535                         |
| mLOX                            | Suicide decedents                                         | Controls      |                     |                                          |                               |
| 1st set                         | 10/28                                                     | 12,367/41,223 | 2.83 (1.14 – 6.98)  | <b>2.45×10<sup>-2</sup></b> <sup>c</sup> |                               |
| 2nd set                         | 16/28                                                     | 12,529/41,224 | 4.34 (1.86 – 10.14) | <b>6.86×10<sup>-4</sup></b> <sup>c</sup> |                               |
| Combined                        |                                                           |               | 3.55 (1.91 – 6.60)  | <b>6.00×10<sup>-5</sup></b> <sup>d</sup> | 0.497                         |
| mLOY                            | Suicide decedents                                         | Controls      |                     |                                          |                               |
| 1st set                         | 12/117                                                    | 11,290/47,647 | 0.64 (0.34 – 1.21)  | 0.169 <sup>c</sup>                       |                               |
| 2nd set                         | 17/130                                                    | 11,445/47,646 | 0.64 (0.37 – 1.13)  | 0.122 <sup>c</sup>                       |                               |
| Combined                        |                                                           |               | 0.64 (0.42 – 0.98)  | 3.86×10 <sup>-2</sup> <sup>d</sup>       | 0.985                         |

<sup>a</sup> P for heterogeneity between two analyses (first set and second set) were calculated by Cochran's Q test.

<sup>b</sup> This indicates the number of subjects with at least one of loss, CN-LOH or gain in autosomal chromosomes.

<sup>c</sup> The p values were calculated with logistic regression analyses, using sex, age and age-squared as confounding factors.

<sup>d</sup> The p values were calculated with meta-analyses with the fixed-effect model. The p values in bold indicate statistically significant ( $p < 0.05/6 [= 8.33 \times 10^{-3}]$ ).

CI, confidence interval; CN-LOH, copy-neutral loss of heterozygosity; mCAs, mosaic chromosomal alterations; mLOX, mosaic loss of the X chromosome; mLOY, mosaic loss of the Y chromosome; OR, odds ratio

**Table S6. The results of logistic regression analyses and meta-analysis for mCAs in suicide death after excluding suicide decedents with comorbid severe physical diseases <sup>a</sup>**

|                                 | Number of subjects with mCA events/<br>number of subjects |               | OR (95% CI)        | p value                                   | P <sub>het</sub> <sup>b</sup> |
|---------------------------------|-----------------------------------------------------------|---------------|--------------------|-------------------------------------------|-------------------------------|
| All autosomal mCAs <sup>c</sup> | Suicide decedents<br>(no physical diseases)               | Controls      |                    |                                           |                               |
| 1st set                         | 29/344                                                    | 8,731/88,870  | 1.53 (1.04 – 2.27) | 0.0323 <sup>d</sup>                       |                               |
| 2nd set                         | 35/293                                                    | 8,814/88,870  | 1.97 (1.37 – 2.85) | <b>2.87×10<sup>-4</sup></b> <sup>d</sup>  |                               |
| Combined                        |                                                           |               | 1.75 (1.34 – 2.29) | <b>4.20×10<sup>-5</sup></b> <sup>e</sup>  | 0.357                         |
| Loss                            | Suicide decedents                                         | Controls      |                    |                                           |                               |
| 1st set                         | 12/344                                                    | 2,636/88,870  | 2.27 (1.26 – 4.07) | <b>6.30×10<sup>-3</sup></b> <sup>d</sup>  |                               |
| 2nd set                         | 16/293                                                    | 2,667/88,870  | 2.96 (1.77 – 4.97) | <b>3.93×10<sup>-5</sup></b> <sup>d</sup>  |                               |
| Combined                        |                                                           |               | 2.64 (1.79 – 3.89) | <b>9.31×10<sup>-7</sup></b> <sup>e</sup>  | 0.495                         |
| CN-LOH                          | Suicide decedents                                         | Controls      |                    |                                           |                               |
| 1st set                         | 15/344                                                    | 5,270/88,870  | 1.2 (0.71 – 2.03)  | 0.488 <sup>d</sup>                        |                               |
| 2nd set                         | 17/293                                                    | 5,237/88,870  | 1.45 (0.88 – 2.39) | 0.143 <sup>d</sup>                        |                               |
| Combined                        |                                                           |               | 1.33 (0.93 – 1.91) | 0.124 <sup>e</sup>                        | 0.613                         |
| Gain                            | Suicide decedents                                         | Controls      |                    |                                           |                               |
| 1st set                         | 4/344                                                     | 1,417/88,870  | 1.56 (0.58 – 4.23) | 0.381 <sup>d</sup>                        |                               |
| 2nd set                         | 6/293                                                     | 1,485/88,870  | 2.13 (0.93 – 4.84) | 0.0724 <sup>d</sup>                       |                               |
| Combined                        |                                                           |               | 1.88 (1.00 – 3.54) | 0.0518 <sup>e</sup>                       | 0.639                         |
| mLOX                            | Suicide decedents                                         | Controls      |                    |                                           |                               |
| 1st set                         | 37/119                                                    | 12,367/41,223 | 2.72 (1.73 – 4.26) | <b>1.35×10<sup>-5</sup></b> <sup>d</sup>  |                               |
| 2nd set                         | 51/105                                                    | 12,529/41,224 | 4.25 (2.77 – 6.53) | <b>3.54×10<sup>-11</sup></b> <sup>d</sup> |                               |
| Combined                        |                                                           |               | 3.44 (2.52 – 4.70) | <b>6.54×10<sup>-15</sup></b> <sup>e</sup> | 0.157                         |
| mLOY                            | Suicide decedents                                         | Controls      |                    |                                           |                               |
| 1st set                         | 18/225                                                    | 11,290/47,647 | 0.76 (0.45 – 1.27) | 0.292 <sup>d</sup>                        |                               |
| 2nd set                         | 15/188                                                    | 11,445/47,646 | 0.58 (0.33 – 1.03) | 6.12×10 <sup>-2</sup> <sup>d</sup>        |                               |
| Combined                        |                                                           |               | 0.67 (0.46 – 0.99) | 4.22×10 <sup>-2</sup> <sup>e</sup>        | 0.0423                        |

<sup>a</sup> This subgroup analyses included suicide decedents whose comorbid severe physical diseases were considered to be the cause of suicide, as determined through psychological autopsies based on their medical records and interviews with their bereaved family members.

<sup>b</sup> P for heterogeneity between two analyses (first set and second set) were calculated by Cochran's Q test.

<sup>c</sup> This indicates the number of subjects with at least one of loss, CN-LOH or gain in autosomal chromosomes.

<sup>d</sup> The p values were calculated with logistic regression analyses, using sex, age and age-squared as confounding factors.

<sup>e</sup> The p values were calculated with meta-analyses with the fixed-effect model. The p values in bold indicate statistically significant ( $p < 0.05/6$  [ $= 8.33 \times 10^{-3}$ ]).

CI, confidence interval; CN-LOH, copy-neutral loss of heterozygosity; mCAs, mosaic chromosomal alterations; mLOX, mosaic loss of the X chromosome; mLOY, mosaic loss of the Y chromosome; OR, odds ratio

**Table S7. The results of logistic regression analyses and meta-analysis for mCAs in suicide death adjusting for smoking status as an additional covariate <sup>a</sup>**

|                                 | Number of subjects with mCA events/<br>number of subjects |                                   | OR (95% CI)        | p value                                   | P <sub>het</sub> <sup>b</sup> |
|---------------------------------|-----------------------------------------------------------|-----------------------------------|--------------------|-------------------------------------------|-------------------------------|
| All autosomal mCAs <sup>c</sup> | Suicide decedents<br>(with smoking status)                | Controls<br>(with smoking status) |                    |                                           |                               |
| 1st set                         | 33/382                                                    | 8,571/87,600                      | 1.40 (0.97 – 2.03) | 0.0710 <sup>d</sup>                       |                               |
| 2nd set                         | 50/329                                                    | 8,675/87,590                      | 2.19 (1.60 – 3.01) | <b>1.11×10<sup>-6</sup></b> <sup>d</sup>  |                               |
| Combined                        |                                                           |                                   | 1.82 (1.43 – 2.31) | <b>1.10×10<sup>-6</sup></b> <sup>e</sup>  | 0.0717                        |
| Loss                            | Suicide decedents                                         | Controls                          |                    |                                           |                               |
| 1st set                         | 12/382                                                    | 2,579/87,600                      | 1.75 (0.98 – 3.15) | 0.0604 <sup>d</sup>                       |                               |
| 2nd set                         | 26/329                                                    | 2,625/87,590                      | 3.62 (2.39 – 5.49) | <b>1.32×10<sup>-9</sup></b> <sup>d</sup>  |                               |
| Combined                        |                                                           |                                   | 2.84 (2.02 – 3.99) | <b>1.62×10<sup>-9</sup></b> <sup>e</sup>  | 0.0476                        |
| CN-LOH                          | Suicide decedents                                         | Controls                          |                    |                                           |                               |
| 1st set                         | 17/382                                                    | 5,187/87,600                      | 1.13 (0.69 – 1.85) | 0.631 <sup>d</sup>                        |                               |
| 2nd set                         | 20/329                                                    | 5,155/87,590                      | 1.32 (0.83 – 2.09) | 0.239 <sup>d</sup>                        |                               |
| Combined                        |                                                           |                                   | 1.23 (0.88 – 1.72) | 0.235 <sup>e</sup>                        | 0.652                         |
| Gain                            | Suicide decedents                                         | Controls                          |                    |                                           |                               |
| 1st set                         | 5/382                                                     | 1,387/87,600                      | 1.42 (0.58 – 3.48) | 0.439 <sup>d</sup>                        |                               |
| 2nd set                         | 11/329                                                    | 1,463/87,590                      | 2.58 (1.39 – 4.79) | <b>2.68×10<sup>-3</sup></b> <sup>d</sup>  |                               |
| Combined                        |                                                           |                                   | 2.13 (1.28 – 3.54) | <b>3.60×10<sup>-3</sup></b> <sup>e</sup>  | 0.284                         |
| mLOX                            | Suicide decedents                                         | Controls                          |                    |                                           |                               |
| 1st set                         | 43/126                                                    | 12,177/40,613                     | 2.88 (1.88 – 4.42) | <b>1.25×10<sup>-6</sup></b> <sup>d</sup>  |                               |
| 2nd set                         | 60/107                                                    | 12,342/40,599                     | 5.12 (3.33 – 7.88) | <b>1.15×10<sup>-13</sup></b> <sup>d</sup> |                               |
| Combined                        |                                                           |                                   | 3.84 (2.83 – 5.20) | <b>4.24×10<sup>-18</sup></b> <sup>e</sup> | 0.0641                        |
| mLOY                            | Suicide decedents                                         | Controls                          |                    |                                           |                               |
| 1st set                         | 25/256                                                    | 11,112/46,987                     | 0.80 (0.51 – 1.24) | 0.317 <sup>d</sup>                        |                               |
| 2nd set                         | 29/222                                                    | 11,269/46,991                     | 0.84 (0.55 – 1.30) | 0.442 <sup>d</sup>                        |                               |
| Combined                        |                                                           |                                   | 0.82 (0.60 – 1.12) | 0.212 <sup>e</sup>                        | 0.854                         |

<sup>a</sup> In this subgroup analyses, suicide decedents and controls with accurate information on smoking status were included. The first cohort consisted of 382 suicide decedents (140 smokers and 142 non-smokers) and 87,600 controls (43,788 smokers and 43,812 non-smokers), and the second cohort consisted of 329 suicide decedents (130 smokers and 199 non-smokers) and 87,590 controls (43,812 smokers and 43,668 non-smokers).

<sup>b</sup> P for heterogeneity between two analyses (first set and second set) were calculated by Cochran's Q test.

<sup>c</sup> This indicates the number of subjects with at least one of loss, CN-LOH or gain in autosomal chromosomes.

<sup>d</sup> The p values were calculated with logistic regression analyses, using sex, age, age-squared and smoking status as confounding factors.

<sup>e</sup> The p values were calculated with meta-analyses with the fixed-effect model. The p values in bold indicate statistically significant ( $p < 0.05/6$  [ $= 8.33 \times 10^{-3}$ ]).

CI, confidence interval; CN-LOH, copy-neutral loss of heterozygosity; mCAs, mosaic chromosomal alterations; mLOX, mosaic loss of the X chromosome; mLOY, mosaic loss of the Y chromosome; OR, odds ratio

**Table S8. The results of logistic regression analyses for mCAs between Kobe healthy participants and BBJ controls**

|                                 | Number of subjects with mCA events/<br>number of subjects |                           | OR (95% CI)        | p value <sup>a</sup> |
|---------------------------------|-----------------------------------------------------------|---------------------------|--------------------|----------------------|
|                                 | Kobe healthy participants <sup>b</sup>                    | BBJ controls <sup>b</sup> |                    |                      |
| All autosomal mCAs <sup>c</sup> | 5/138                                                     | 17,545/177,740            | 0.62 (0.25 – 1.53) | 0.298                |
| Loss                            | 3/138                                                     | 5,303/177,740             | 1.38 (0.43 – 4.40) | 0.582                |
| CN-LOH                          | 3/138                                                     | 10,507/177,740            | 0.59 (0.19 – 1.88) | 0.377                |
| Gain                            | 2/138                                                     | 2,902/177,740             | 1.93 (0.47 – 7.94) | 0.361                |
| mLOX                            | 5/61                                                      | 24,896/82,447             | 0.37 (0.14 – 0.96) | 0.0421               |
| mLOY                            | 5/77                                                      | 22,735/95,293             | 0.63 (0.24 – 1.65) | 0.343                |

<sup>a</sup> The p values were calculated with logistic regression analyses, using sex, age and age-squared as confounding factors. The p values in bold indicate statistically significant ( $p < 0.05/6$  [ $= 8.33 \times 10^{-3}$ ]).

<sup>b</sup> Kobe healthy participants were collected at the local Kobe University laboratory, whereas main BBJ controls from all over Japan.

<sup>c</sup> This indicates the number of subjects with at least one of loss, CN-LOH or gain in autosomal chromosomes.

BBJ, BioBank Japan; CI, confidence interval; CN-LOH, copy-neutral loss of heterozygosity; mCAs, mosaic chromosomal alterations; mLOX, mosaic loss of the X chromosome; mLOY, mosaic loss of the Y chromosome; OR, odds ratio



**Table S9. The results of logistic regression analyses for mCAs between suicide decedents and non-suicide decedents**

|                                 | Number of subjects with mCA events/<br>number of subjects |                                    | OR (95% CI)         | p value <sup>a</sup>        |
|---------------------------------|-----------------------------------------------------------|------------------------------------|---------------------|-----------------------------|
|                                 | Suicide decedents <sup>b</sup>                            | Non-Suicide decedents <sup>b</sup> |                     |                             |
| All autosomal mCAs <sup>c</sup> | 89/773                                                    | 5/91                               | 1.77 (0.68 – 4.63)  | 0.242                       |
| Loss                            | 40/773                                                    | 1/91                               | 3.88 (0.52 – 29.01) | 0.187                       |
| CN-LOH                          | 42/773                                                    | 3/91                               | 1.30 (0.38 – 4.38)  | 0.675                       |
| Gain                            | 18/773                                                    | 1/91                               | 1.47 (0.18 – 11.68) | 0.716                       |
| mLOX                            | 110/258                                                   | 5/38                               | 6.03 (2.21 – 16.46) | <b>4.53×10<sup>-4</sup></b> |
| mLOY                            | 55/515                                                    | 5/53                               | 0.75 (0.27 – 2.11)  | 0.589                       |

<sup>a</sup> The p values were calculated with logistic regression analyses, using sex, age and age-squared as confounding factors. The p values in bold indicate statistically significant ( $p < 0.05/6$  [ $= 8.33 \times 10^{-3}$ ]).

<sup>b</sup> Suicide decedents and non-suicide decedents were collected at the local Kobe University laboratory.

<sup>c</sup> This indicates the number of subjects with at least one of loss, CN-LOH or gain in autosomal chromosomes.

CI, confidence interval; CN-LOH, copy-neutral loss of heterozygosity; mCAs, mosaic chromosomal alterations; mLOX, mosaic loss of the X chromosome; mLOY, mosaic loss of the Y chromosome; OR, odds ratio

**Table S10. The results of logistic regression analyses for mCAs in non-suicide decedents and BBJ controls**

|                                 | Number of subjects with mCA events/<br>number of subjects |                | OR (95% CI)         | p value <sup>b</sup> |
|---------------------------------|-----------------------------------------------------------|----------------|---------------------|----------------------|
|                                 | Non-suicide decedents                                     | BBJ controls   |                     |                      |
| All autosomal mCAs <sup>a</sup> | 5/91                                                      | 17,545/177,740 | 0.93 (0.37 – 2.32)  | 0.875                |
| Loss                            | 1/91                                                      | 5,303/177,740  | 0.66 (0.09 – 4.74)  | 0.675                |
| CN-LOH                          | 3/91                                                      | 10,507/177,740 | 0.89 (0.28 – 2.82)  | 0.836                |
| Gain                            | 1/91                                                      | 2,902/177,740  | 1.42 (0.20 – 10.33) | 0.728                |
| mLOX                            | 5/38                                                      | 24,896/82,447  | 0.56 (0.21 – 1.48)  | 0.242                |
| mLOY                            | 5/53                                                      | 22,735/95,293  | 0.95 (0.35 – 2.57)  | 0.922                |

<sup>a</sup> This indicates the number of subjects with at least one of loss, CN-LOH or gain in autosomal chromosomes.

<sup>b</sup> The p values were calculated with logistic regression analyses, using sex, age and age-squared as confounding factors. The p values in bold indicate statistically significant ( $p < 0.05/6$  [ $= 8.33 \times 10^{-3}$ ]).

BBJ, BioBank Japan; CI, confidence interval; CN-LOH, copy-neutral loss of heterozygosity; mCAs, mosaic chromosomal alterations; mLOX, mosaic loss of the X chromosome; mLOY, mosaic loss of the Y chromosome; OR, odds ratio

**Table S11. The results of logistic regression analyses between mCAs and postmortem interval**

|                                                          | OR (95% CI)        | p value <sup>a</sup> |
|----------------------------------------------------------|--------------------|----------------------|
| All autosomal mCAs <sup>b</sup>                          |                    |                      |
| Suicide decedents <sup>c</sup>                           | 1.13 (0.94 – 1.37) | 0.203                |
| Suicide decedents and non-suicide decedents <sup>d</sup> | 1.12 (0.93 – 1.35) | 0.228                |
| Loss                                                     |                    |                      |
| Suicide decedents <sup>c</sup>                           | 1.20 (0.93 – 1.55) | 0.160                |
| Suicide decedents and non-suicide decedents <sup>d</sup> | 1.16 (0.90 – 1.50) | 0.257                |
| CN-LOH                                                   |                    |                      |
| Suicide decedents <sup>c</sup>                           | 1.05 (0.81 – 1.37) | 0.700                |
| Suicide decedents and non-suicide decedents <sup>d</sup> | 1.08 (0.84 – 1.38) | 0.551                |
| Gain                                                     |                    |                      |
| Suicide decedents <sup>c</sup>                           | 1.25 (0.85 – 1.84) | 0.258                |
| Suicide decedents and non-suicide decedents <sup>d</sup> | 1.22 (0.83 – 1.81) | 0.317                |
| mLOX                                                     |                    |                      |
| Suicide decedents <sup>c</sup>                           | 1.05 (0.79 – 1.39) | 0.730                |
| Suicide decedents and non-suicide decedents <sup>d</sup> | 1.06 (0.82 – 1.38) | 0.653                |
| mLOY                                                     |                    |                      |
| Suicide decedents <sup>c</sup>                           | 1.20 (0.96 – 1.49) | 0.114                |
| Suicide decedents and non-suicide decedents <sup>d</sup> | 1.16 (0.93 – 1.45) | 0.191                |

<sup>a</sup> The p values were calculated with logistic regression analyses, using sex, age and age-squared as confounding factors.

<sup>b</sup> This indicates the number of subjects with at least one of loss, CN-LOH or gain in autosomal chromosomes.

<sup>c</sup> In these, the distribution of PMI is as follows: 55 suicide decedents were within 6 hours, 145 were between 6 and 12 hours, 332 were between 12 and 24 hours, 154 were 24 and 48 hours, 24 were between 48 and 72 hours, and 28 were over 72 hours.

<sup>d</sup> In these, the distribution of PMI is as follows: 56 decedents were within 6 hours, 158 were between 6 and 12 hours, 357 were between 12 and 24 hours, 184 were 24 and 48 hours, 39 were between 48 and 72 hours, and 33 were over 72 hours.

CI, confidence interval; CN-LOH, copy-neutral loss of heterozygosity; mCAs, mosaic chromosomal alterations; mLOX, mosaic loss of the X chromosome; mLOY, mosaic loss of the Y chromosome; OR, odds ratio; PMI, postmortem interval

**Table S12. Distribution of mCA events in suicide decedents and controls**

| mCA events <sup>a</sup> | 1st set                 |                        | 2nd set           |                        |
|-------------------------|-------------------------|------------------------|-------------------|------------------------|
|                         | Suicide decedents (M/F) | Controls               | Suicide decedents | Controls               |
| 0                       | 311 (230/81)            | 80,139 (42,219/37,920) | 240 (183/57)      | 80,056 (42,217/37,839) |
| 1                       | 88 (42/46)              | 7,721 (4,734/2,987)    | 95 (40/55)        | 7,761 (4,704/3,057)    |
| 2                       | 10 (3/7)                | 834 (567/267)          | 22 (12/10)        | 864 (592/272)          |
| 3                       | 1 (0/1)                 | 112 (79/33)            | 2 (1/1)           | 143 (104/39)           |
| 4                       | 0 (0/0)                 | 34 (26/8)              | 1 (1/0)           | 20 (11/9)              |
| 5                       | 0 (0/0)                 | 13 (10/3)              | 1 (1/0)           | 13 (10/3)              |
| 6                       | 0 (0/0)                 | 7 (4/3)                | 0 (0/0)           | 6 (4/2)                |
| 7                       | 0 (0/0)                 | 5 (5/0)                | 1 (1/0)           | 3 (1/2)                |
| 8                       | 0 (0/0)                 | 0 (0/0)                | 0 (0/0)           | 0 (0/0)                |
| 9                       | 0 (0/0)                 | 2 (2/0)                | 0 (0/0)           | 2 (1/1)                |
| 10                      | 0 (0/0)                 | 2 (1/1)                | 0 (0/0)           | 1 (1/0)                |
| 11                      | 0 (0/0)                 | 0 (0/0)                | 0 (0/0)           | 0 (0/0)                |
| 12                      | 0 (0/0)                 | 0 (0/0)                | 0 (0/0)           | 0 (0/0)                |
| 13                      | 0 (0/0)                 | 0 (0/0)                | 1 (1/0)           | 1 (1/0)                |
| 14                      | 0 (0/0)                 | 0 (0/0)                | 0 (0/0)           | 0 (0/0)                |
| 15                      | 0 (0/0)                 | 0 (0/0)                | 0 (0/0)           | 0 (0/0)                |
| 16                      | 0 (0/0)                 | 1 (0/1)                | 0 (0/0)           | 0 (0/0)                |

<sup>a</sup> These indicate the numbers of mCA event in 1–22, X and Y chromosomes.  
F, Females; M, Males; mCA, mosaic chromosomal alteration

**Table S13. The results of logistic regression analyses and meta-analysis for mCAs in suicide death using only subjects with fewer than ten mCA events**

|                                 | Number of subjects with mCA events/<br>number of subjects |               | OR (95% CI)        | p value                                   | P <sub>het</sub> <sup>a</sup> |
|---------------------------------|-----------------------------------------------------------|---------------|--------------------|-------------------------------------------|-------------------------------|
| All autosomal mCAs <sup>b</sup> | Suicide decedents<br>(mCA events < 10)                    | Controls      |                    |                                           |                               |
| 1st set                         | 37/410                                                    | 8,728/88,867  | 1.42 (1.00 – 2.01) | 0.0500 <sup>c</sup>                       |                               |
| 2nd set                         | 51/362                                                    | 8,812/88,868  | 1.98 (1.45 – 2.71) | <b>1.57×10<sup>-5</sup></b> <sup>c</sup>  |                               |
| Combined                        |                                                           |               | 1.71 (1.36 – 2.16) | <b>5.94×10<sup>-6</sup></b> <sup>d</sup>  | 0.159                         |
| Loss                            | Suicide decedents                                         | Controls      |                    |                                           |                               |
| 1st set                         | 13/410                                                    | 2,633/88,867  | 1.72 (0.98 – 3.01) | 0.0600 <sup>c</sup>                       |                               |
| 2nd set                         | 26/362                                                    | 2,665/88,868  | 3.27 (2.16 – 4.94) | <b>1.85×10<sup>-8</sup></b> <sup>c</sup>  |                               |
| Combined                        |                                                           |               | 2.61 (1.87 – 3.64) | <b>1.62×10<sup>-8</sup></b> <sup>d</sup>  | 0.0697                        |
| CN-LOH                          | Suicide decedents                                         | Controls      |                    |                                           |                               |
| 1st set                         | 20/410                                                    | 5,267/88,867  | 1.18 (0.75 – 1.87) | 0.467 <sup>c</sup>                        |                               |
| 2nd set                         | 21/362                                                    | 5,235/88,868  | 1.22 (0.78 – 1.91) | 0.386 <sup>c</sup>                        |                               |
| Combined                        |                                                           |               | 1.20 (0.87 – 1.66) | 0.259 <sup>d</sup>                        | 0.929                         |
| Gain                            | Suicide decedents                                         | Controls      |                    |                                           |                               |
| 1st set                         | 6/410                                                     | 1,416/88,867  | 1.57 (0.69 – 3.55) | 0.280 <sup>c</sup>                        |                               |
| 2nd set                         | 11/362                                                    | 1,483/88,868  | 2.48 (1.34 – 4.58) | <b>3.84×10<sup>-3</sup></b> <sup>c</sup>  |                               |
| Combined                        |                                                           |               | 2.10 (1.28 – 3.43) | <b>3.10×10<sup>-3</sup></b> <sup>d</sup>  | 0.382                         |
| mLOX                            | Suicide decedents                                         | Controls      |                    |                                           |                               |
| 1st set                         | 46/135                                                    | 12,367/41,221 | 2.79 (1.85 – 4.22) | <b>1.09×10<sup>-6</sup></b> <sup>c</sup>  |                               |
| 2nd set                         | 64/123                                                    | 12,529/41,224 | 4.39 (2.95 – 6.53) | <b>3.04×10<sup>-13</sup></b> <sup>c</sup> |                               |
| Combined                        |                                                           |               | 3.53 (2.65 – 4.70) | <b>5.83×10<sup>-18</sup></b> <sup>d</sup> | 0.122                         |
| mLOY                            | Suicide decedents                                         | Controls      |                    |                                           |                               |
| 1st set                         | 26/275                                                    | 11,290/47,646 | 0.68 (0.44 – 1.04) | 7.79×10 <sup>-2</sup> <sup>c</sup>        |                               |
| 2nd set                         | 29/239                                                    | 11,445/47,644 | 0.68 (0.44 – 1.04) | 7.60×10 <sup>-2</sup> <sup>c</sup>        |                               |
| Combined                        |                                                           |               | 0.68 (0.5 – 0.92)  | 1.24×10 <sup>-2</sup> <sup>d</sup>        | 0.992                         |

<sup>a</sup> P for heterogeneity between two analyses (first set and second set) were calculated by Cochran's Q test.

<sup>b</sup> This indicates the number of subjects with at least one of loss, CN-LOH or gain in autosomal chromosomes.

<sup>c</sup> The p values were calculated with logistic regression analyses, using sex, age and age-squared as confounding factors.

<sup>d</sup> The p values were calculated with meta-analyses with the fixed-effect model. The p values in bold indicate statistically significant ( $p < 0.05/6 [= 8.33 \times 10^{-3}]$ ).

CI, confidence interval; CN-LOH, copy-neutral loss of heterozygosity; mCAs, mosaic chromosomal alterations; mLOX, mosaic loss of the X chromosome; mLOY, mosaic loss of the Y chromosome; OR, odds ratio

**Fig. S1. The results of principal component analysis (PCA)**

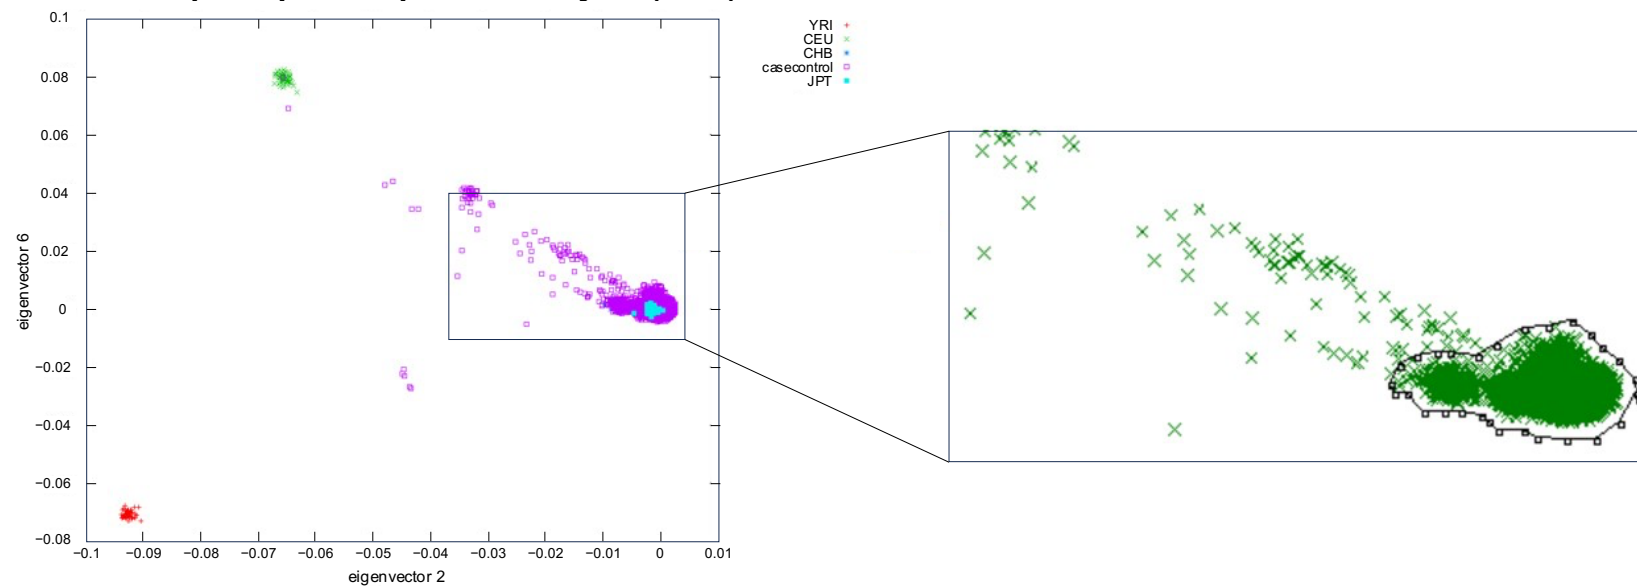

We mapped the BioBank Japan (BBJ) samples with 1KG populations and removed the samples that were PCA outliers from East Asian clusters in a plot.

**Fig. S2. An overview of the study cohort**

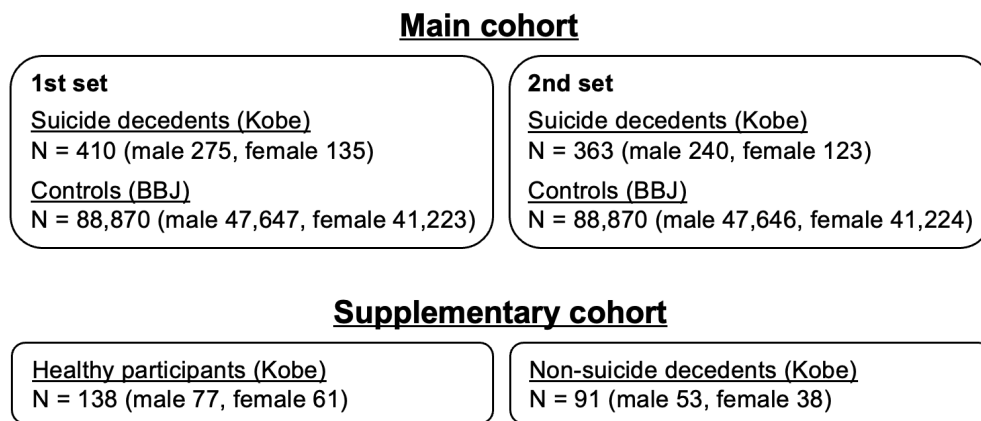



**Fig. S3. Distribution of detectable mosaicisms stratified by each autosomal chromosome**

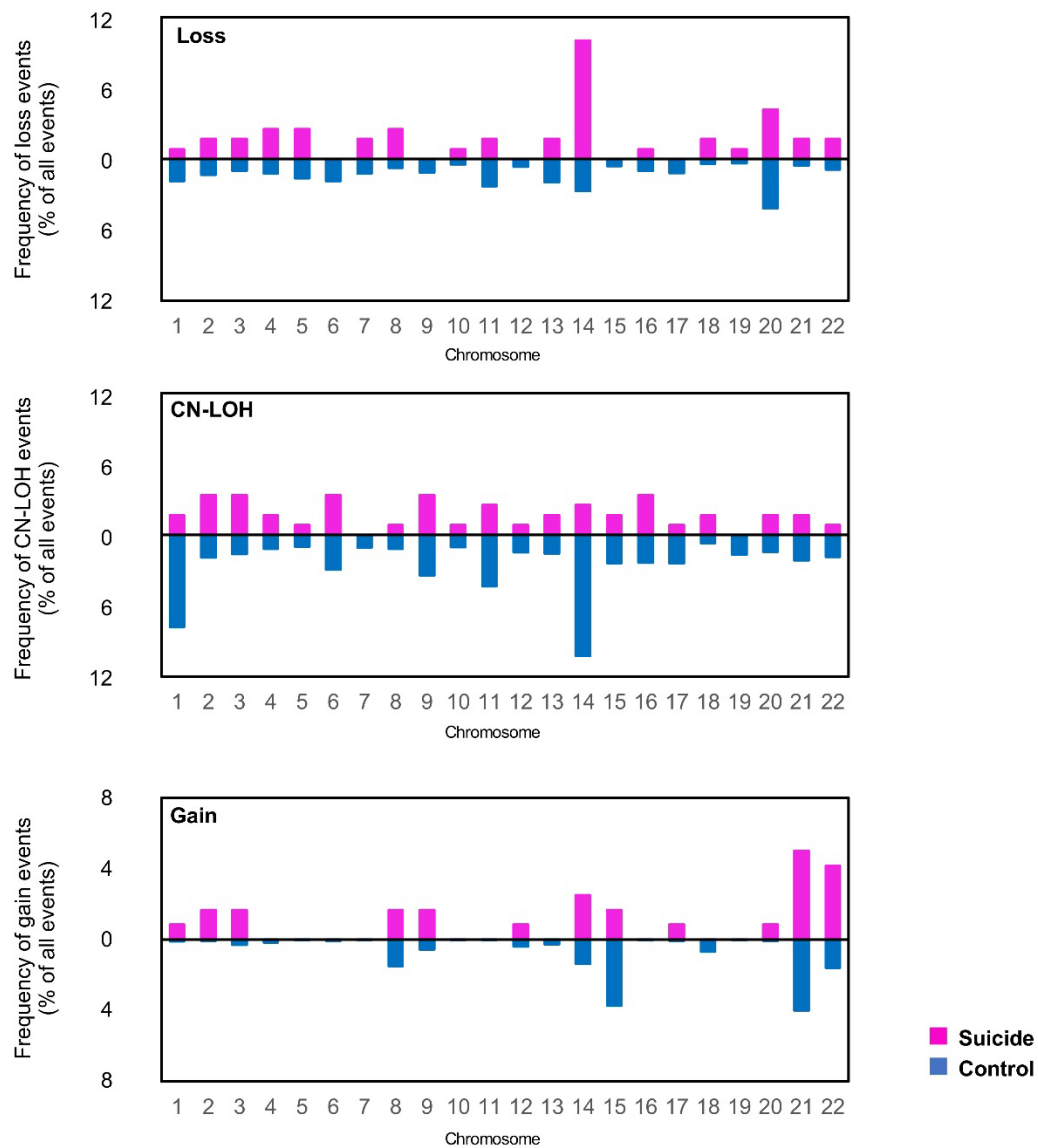

The vertical axis shows the frequency of occurrence of each chromosome, each mosaic out of the total autosomal mosaic occurrence in suicide decedents (magenta), and the control group (blue) of the integrated first and second sets. The statistical values of Spearman's correlation analysis between the two groups for the frequency of occurrence of each mCA (loss, CN-LOH, and gain) for each chromosome were as follows:  $R = 0.630$ ,  $p = 1.45 \times 10^{-8}$ .

CN-LOH, copy-neutral loss of heterozygosity; chr, chromosome; mCA, mosaic chromosomal alteration.

**Fig. S4. Frequency of detectable mosaicism stratified by age, after excluding suicide decedents with diagnosed/possible psychiatric disorders**

**1st set**

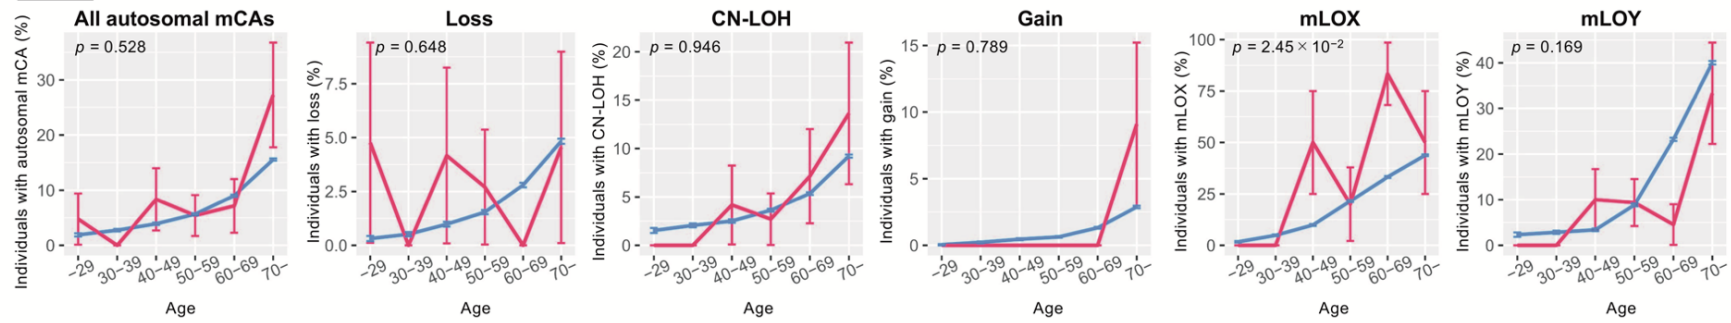

**2nd set**

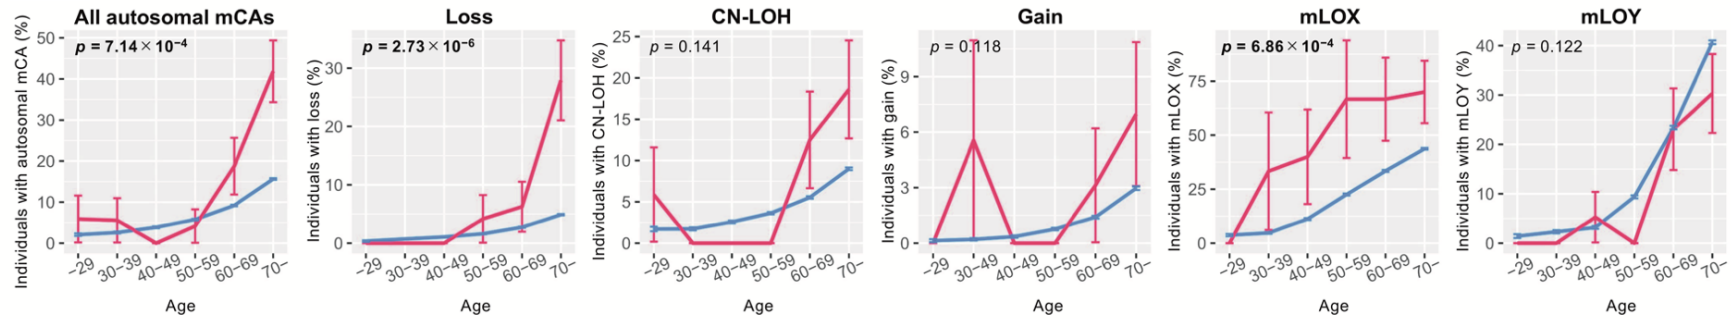

**Combined**

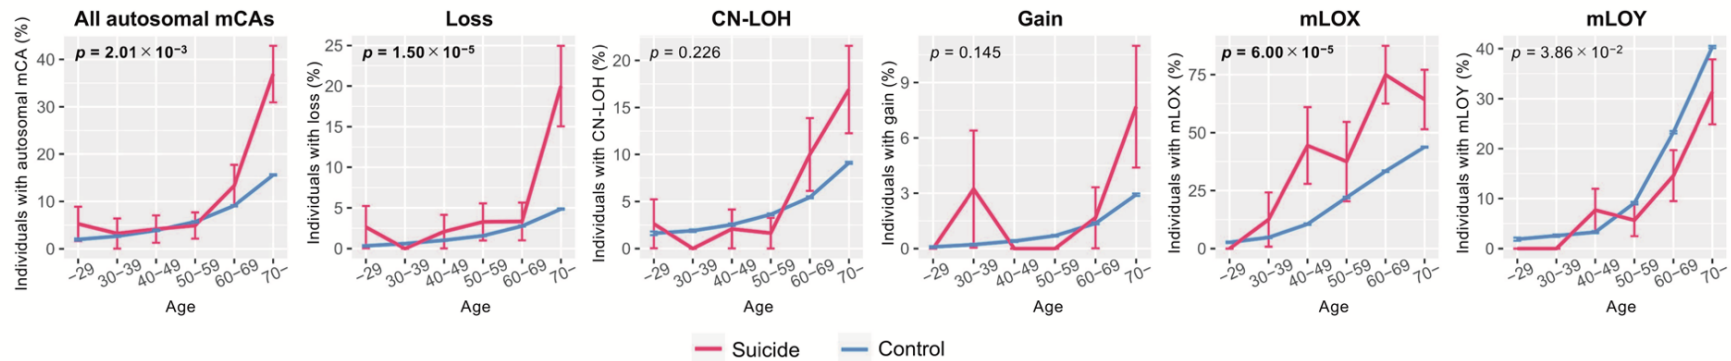

x-axis and y-axis represents age-category and the percentage of occurrence of each detectable mosaicism, respectively. Error bars indicate  $\pm$  standard error. Blue lines denote control group, and magenta lines denote suicide decedents group. The p values for the 1st and 2nd set were calculated with logistic regression analyses adjusted with sex (for only autosomal mosaicisms), age, age-squared and array. The p values for the meta-analysis were calculated with fixed-effect model.

CN-LOH, copy-neutral loss of heterozygosity; mCA, mosaic chromosomal alteration; mLOX, mosaic loss of the X chromosome; mLOY, mosaic loss of the Y chromosome.

**Fig. S5. Scatter plot of MR analysis inferring causal effect of mLOX and mLOY on suicide death**

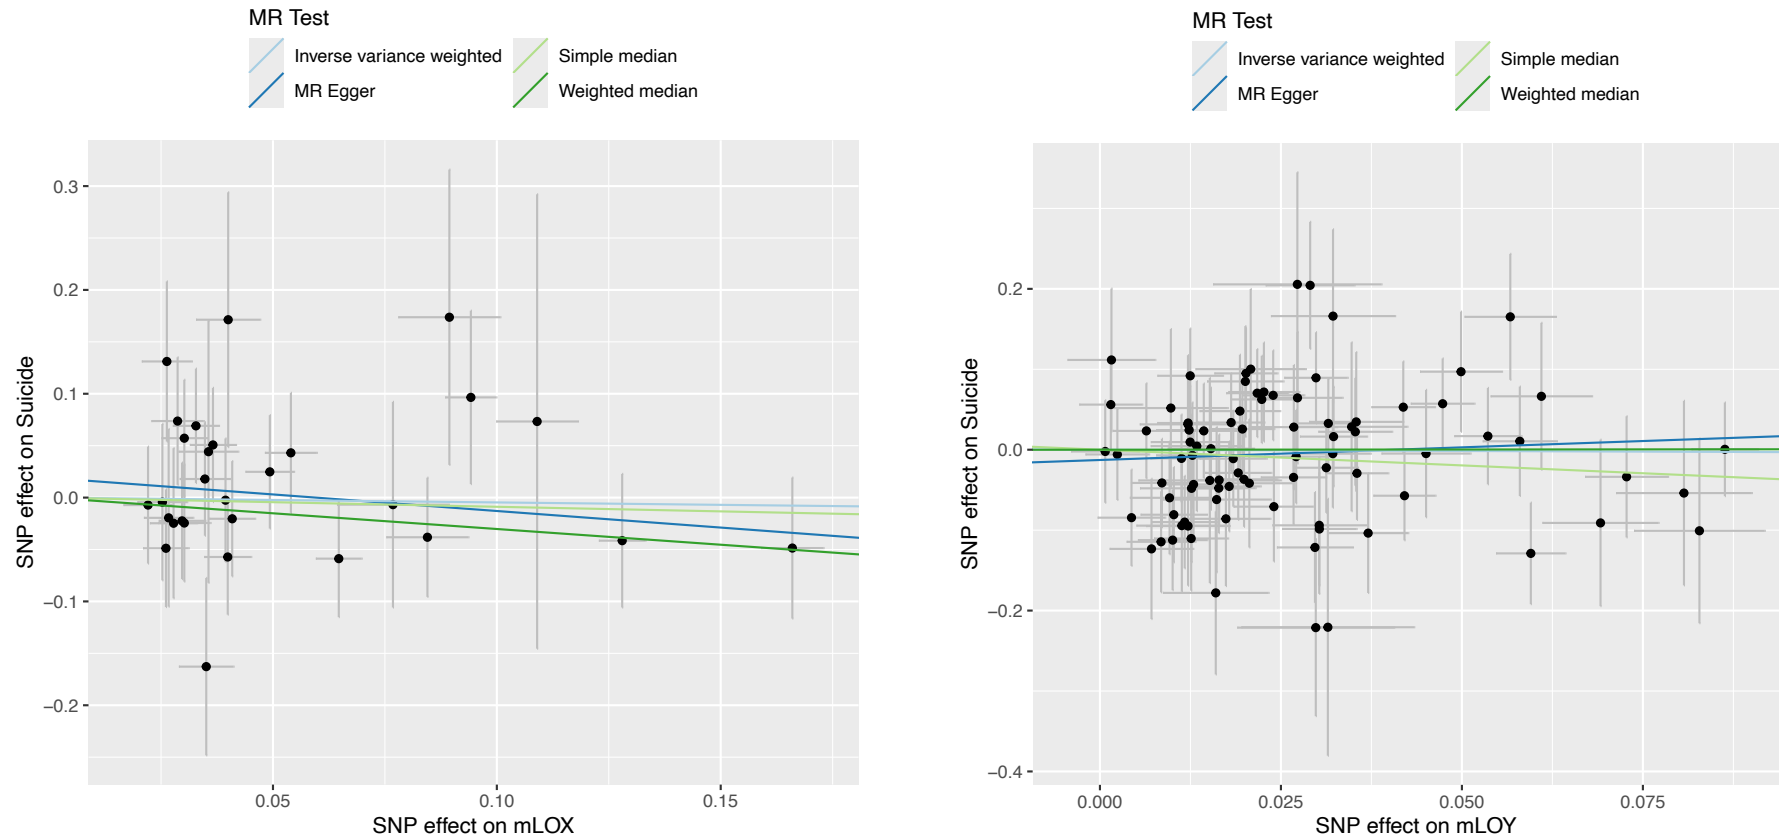

Scatter plots for the Mendelian randomization (MR) of the causal effect of mLOX or mLOY (exposure variable) on suicide death (outcome variable). Each dot represents the mLOX/mLOY-associated single nucleotide polymorphism (SNP) plotted along with the effect size estimates on mLOX/mLOY (x-axis) and suicide (y-axis). Error bars represent 95% confidence intervals. Coloured lines represent the causal association evaluated by four MR methods: inverse variance weighted (IVW); MR- Egger; simple median; weighted median. Full results can be seen in **Table S2**.
